# Supplementary material for: Major QTLs, qARO1 and qARO9, Additively Regulate Adaxial Leaf Rolling in Rice
Source: Front Plant Sci. 2021 Feb 19;12:626523. doi: 10.3389/fpls.2021.626523 (PMC7940999; doi:10.3389/fpls.2021.626523)
Supplement: Supplementary file 2 [file Table_1.XLSX]

## Sheet: Table S1
Supplementary Table S2. List of primers used in this study.
Marker namea	Chr.	Variant position (bp)	Primer sequence (5'-3')b		Amplicon size (bp)		Marker purposec
			Forward	Reverse	M23	T887	M	G	B
01id228189	1	228189	CTTCTACTCGCTCGCACCAT	TGTTGGTTGCGATTGTAAGGA	115	140	o
01id742237	1	742237	CAAAACCTAACCAGCGCTTGT	GCTGGGAGCTGTAATCCAATTT	149	189	o
01id1124352	1	1124352	GGTTGTCTTGACTGCAGTGG	AGGACAACCTAAAGGAAAGTAGACA	145	164	o
01id2377850	1	2377850	ATCGCCCTGTACAAGAACGG	TGCACCACCAAACAGAGACA	154	185	o
01id3057392	1	3057392	TTCCACTTGCAGGACCATCC	CAGGCTGATCAAGAGCTAGCA	147	116	o
01id4052916	1	4052916	AGTGGATGCGGGAAATTCAT	GCTGGCGTGTAGGATACGTA	150	173		o	o
01id4431131	1	4431131	CAGCTGAACACTGCTACCTAGT	CAGTGCCTGACAGCCTCTTA	167	199	o	o
01id4593923	1	4593923	CCTGCTACTCCAGAAGCCAG	CATACGTAACGCCTTTGCCC	162	186	o	o
01id4673121	1	4673121	ACAGAATAATCCAACAATAAATGTGC	CGGACAAGTGGAGCAGAACT	138	160		o	o
01id4738572	1	4738572	GTACGCTGTTTATTCCCCTTCTTC	ACATCCCACTCGAAAGCTATCTG	137	161	o	o
01id4814665	1	4814665	ACAATTAATTTGTCCATGTAATCGAGA	CCATATAACCAAAGCGCAGTGG	105	121	o
01id4854718	1	4854718	GTGATAGAATCATAGAATTGCCATACA	CTTTGAGATATGGAATTCTGGCAA	168	150	o
01asp4916781	1	4916780	GTACGTAGGGGTAGAGTAGTCACT / CGTAGGGGTAGAGTAGTCACC	GATGGTCGGCTCAGATCCAC	121 (T)	118 (C)	o
01id4927856	1	4927856	CATCTCACGGTTTACATACGAGT	CTGATGCTGCACAAATTACAAATT	118	139	o
01id4946123	1	4946123	ACACGGGAATGATAAGTTTTGGT	CGCCCATCTTTCTTCCACAGTAT	163	187	o
01id5126999	1	5126999	TTCTCCTTGGCCATTGTTTAAATCC	GATAGAGCCTAAGGGTGTGTTTAGT	277	296	o	o
01id5210929	1	5210929	GCAACTCCATTGGCTCCTGA	GGTCAAGGAGAGAATACCAATGC	98	129	o	o	o
01id7019047	1	7019047	AAGAGTTTGCTGCAACACGT	CGGTATGTCGAACAGGGCAA	104	140	o
01id9572936	1	9572936	TCCTAAACTCAATTCCCTCCGT	ACTGGACAGACGGTTAAAACAATT	112	146	o
01id12351520	1	12351520	ACAAGCATCCTGATTCCCTG	TAGAAATACCCACGCCCCAA	95	127	o
01id16062352	1	16062352	TAGGCTGGGTTTAGTGTGGG	GAAGCATCACCCCGTTGAAA	98	124	o
01id17770682	1	17770682	AGGTGATACAGTTGCAGGGA	GGTAGTCACAGTGGCGGT	117	146	o
05id20410437	5	20410437	TAACTCTAACATAAAGTAATGGTGGGG	TTATCGGAAAATTATAGATTTGGGACC	100	120	o	o
05id23047412	5	23047412	ACGGAGGGAGTACCAAAAACA	GGTTTACCCCATAACCTCATATCCT	127	149	o	o
05id25607164	5	25607164	AGTCATGGCGTCCAAGAAGT	AACGGGCCCTTATTCTCGAC	123	147	o	o
06id19399521	6	19399521	CACGCCGACTCCATTGTACT	ACATGGCGGCTACTTCCTTC	151	173			o
06id20255093	6	20255093	GGCTAACCCATCTCCCGATA	TGCCTTGACCTTGACAACCA	128	149			o
06id21477272	6	21477272	CACTTTACTCTAAATTAGATGTGGACA	GGATGGCCAACATGCATACTC	150	113			o
09id18904919	9	18904919	AGACACATTTAAATCCAACGAATCT	GCAGCCACAACTATCTCCTCC	170	215			o
09id19121466	9	19121466	CTCTGCCATCGAAGTCACGT	ACCGTGCATTGCATAGGATTG	131	159	o
09id19521288	9	19521288	CGGTACTGAAGGCTTCATTGTT	CGAAGCTTTTCATTAGCGACTAA	130	150	o
09id19547037	9	19547037	TCAAACCAATTCAGACGGCATT	TACCACACCTCTCCCGTACTG	128	148	o
09id19607766	9	19607766	CCTGTGGTGGTCTATCTTCAGC	CCATTGCAAAAGCACTGAGGTTA	119	138	o
09asp19628591	9	19628591	GGTGCAGAAGACCACAAGTAGA	AGCGGCATGGACAGAGAC / AGCGGCATGGACAGAGAT	112 (G)	112 (A)	o
09id19650402	9	19650402	CTAGTCAAGCGCACCAACCAT	CTTACTTTACCATTGCGGGTGT	99	86	o
09id19662261	9	19662261	TCAAGTGGAGCCTAAAGTTTATAAAAC	TCAAGATCTTGAAACATTGACTATCAA	112	128	o
09asp19696217	9	19696217	CCGCGAAGTTCAGATGTGT / CGCGAAGTTCAGATGTGC	AATTCGTATCCTATCAAGCATAGTTG	104 (T)	104 (C)	o
09id19719174	9	19719174	ACAAAGGGATGGATTTTCTTATTAAGT	CATTGTATTACCTTATATTCGAAGGCA	100	87	o
09id19740436	9	19740436	ACTATTTAGAGAATGAGAGATGTTCGA	GAGGCGGTCTAGAGGCAAAG	179	204	o
09id19822650	9	19822650	ATTCATGCCTGCTCTGCTCG	CGGAGACCGTGTCAAAGTCT	131	157	o		o
09id20138978	9	20138978	GGGTTCTTTTATCTTGTGTGGGTG	GCCTTATCAAACATAGCTCGAGC	163	190	o
09id20424529	9	20424529	AATATGGCACCGCAGAGTCC	CATACAACCCAGGCAGCTGA	162	190	o
aMarker name was determined based on the chromosome number, marker type, and physical position. id and asp in marker type indicate InDel marker and allele-specific marker, respectively. bThe difference in the 3' terminal nucleotide of the allele-specific marker (underlined nucleotide) provides specificity for discriminating the alleles. cM, Mapping; G, Examining gene action; B, Background selecti…
